# Supplementary material
Source: PubMed Central journal article supplement (PMC3700130)
Supplement: MCB.01519-12_zmb999100036so1.pdf [file MCB.01519-12_zmb999100036so1.pdf]

# Fig. S1

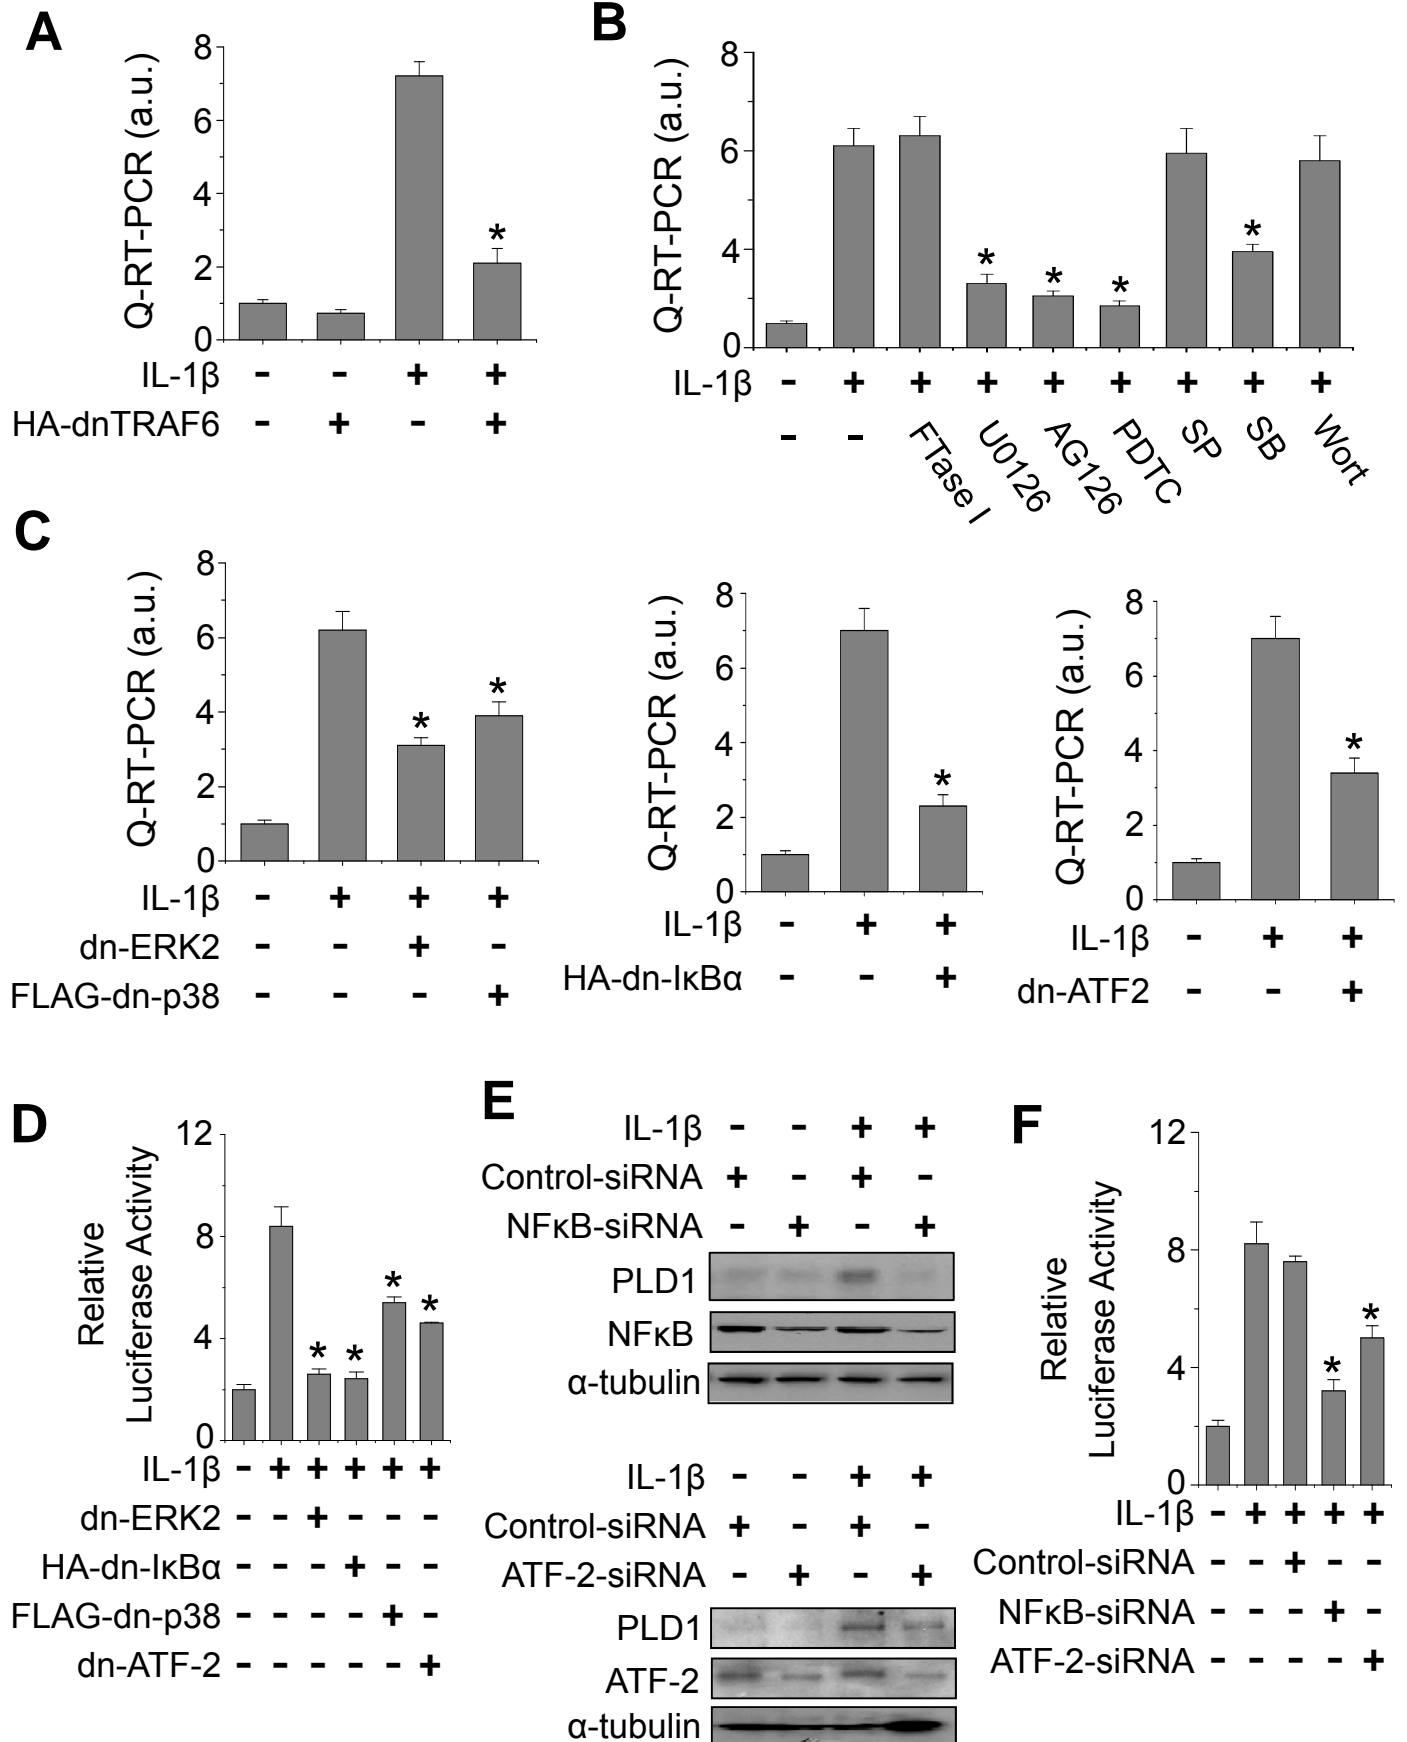

**Fig. S1** IL-1 $\beta$ -induced PLD1 expression is mediated by the TRAF6/ERK/NF $\kappa$ B or TRAF6/p38/ATF-2 signaling pathways. (A) RAFLS were transfected with dnTRAF6, treated with IL-1 $\beta$  for 36 h, and PLD1 expression was analyzed by q-PCR. (B) RAFLS were pretreated with the indicated inhibitors for 30 min, treated with IL-1 $\beta$  for 36 h, and PLD1 expression was analyzed by q-PCR (\* $P$  < 0.05 *versus* IL-1 $\beta$ ). (C) RAFLS were transfected with expression vectors for dominant negative ERK, p38, I $\kappa$ B $\alpha$ , or ATF-2, stimulated with IL-1 $\beta$ , after which PLD1 expression was analyzed by q-PCR. \* $P$  < 0.05 *versus* IL-1 $\beta$ . (D) After transfection of RAFLS with pGL4-PLD1, cells were pretreated with the indicated inhibitors, stimulated with IL-1 $\beta$  for 24 h, and then luciferase activity was measured (\* $P$  < 0.05 *versus* IL-1 $\beta$ ). (E) RAFLS were transfected with siRNAs specific to NF $\kappa$ B or ATF-2, treated with IL-1 $\beta$ , and lysates were immunoblotted with the indicated antibodies. (F) After co-transfection of RAFLS with pGL4-PLD1 and the indicated siRNAs, the cells were treated with IL-1 $\beta$  and luciferase activity was measured (\* $P$  < 0.05 *versus* IL-1 $\beta$ ). Data are presented as the mean  $\pm$  SD of 4 independent experiments.

## Fig. S2

| Position :           | [-1281 ~ -1272]             | [-1177 ~ -1168]            | [-590 ~ -579]      | [-515 ~ -506]              | [-59 ~ -50]                |
|----------------------|-----------------------------|----------------------------|--------------------|----------------------------|----------------------------|
|                      | NFκB-1                      | NFκB-2                     | ATF-2              | NFκB-3                     | NFκB-4                     |
| pGL4 PLD1 (-1930/+1) | TTGAATTTCC                  | AGCATTTC                   | atACGTCAtt         | GGATATCACC                 | GGAATAGCAT                 |
| NFκB-1 <i>mut</i>    | TT <b>CA</b> ATTT <b>AG</b> | AGCATTTC                   | atACGTCAtt         | GGATATCACC                 | GGAATAGCAT                 |
| NFκB-2 <i>mut</i>    | TTGAATTTCC                  | <b>AC</b> CATTTC <b>AG</b> | atACGTCAtt         | GGATATCACC                 | GGAATAGCAT                 |
| NFκB-3 <i>mut</i>    | TTGAATTTCC                  | AGCATTTC                   | atACGTCAtt         | <b>CT</b> ATATC <b>AGG</b> | GGAATAGCAT                 |
| NFκB-4 <i>mut</i>    | TTGAATTTCC                  | AGCATTTC                   | atACGTCAtt         | GGATATCACC                 | <b>GCA</b> ATAG <b>AGT</b> |
| NFκB-1/4 <i>mut</i>  | TT <b>CA</b> ATTT <b>AG</b> | AGCATTTC                   | atACGTCAtt         | GGATATCACC                 | <b>GCA</b> ATAG <b>AGT</b> |
| ATF-2 <i>mut</i>     | TTGAATTTCC                  | AGCATTTC                   | at <b>AA</b> TCAtt | GGATATCACC                 | GGAATAGCAT                 |

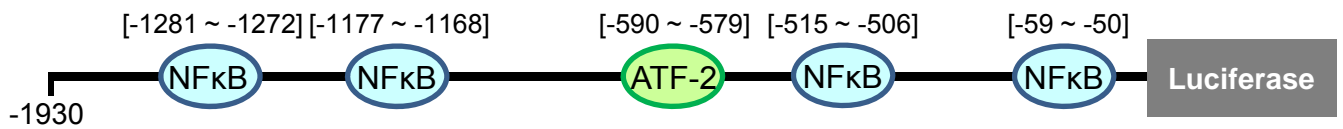

**Fig. S2** Schematic representation of putative NF $\kappa$ B- and ATF-2-binding sites in the PLD1 promoter, and its six mutant constructs. A site-specific mutation was introduced into NF $\kappa$ B or ATF-2 binding sites on the PLD1 promoter using a Quick Change Site-Directed Mutagenesis Kit (Stratagene, LaJolla, CA) according to the manufacturer's instructions.

# Fig. S3

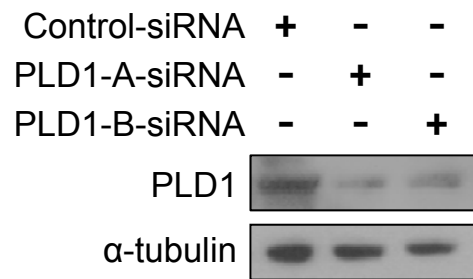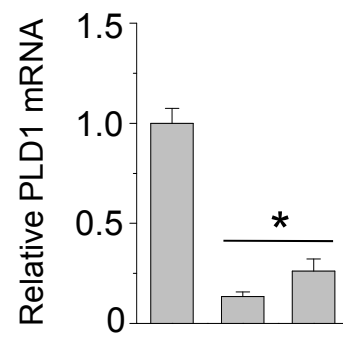

**Fig. S3** The effect of PLD1 siRNAs on PLD1 expression. Cells were transfected with siRNAs for control or two kinds of siRNAs specific to PLD1 and PLD1 expression was analyzed by western blot and Q-RT-PCR. \* $P < 0.05$  versus control-siRNA. Data are presented as the mean  $\pm$  SD of 4 independent experiments.

**Fig. S4**

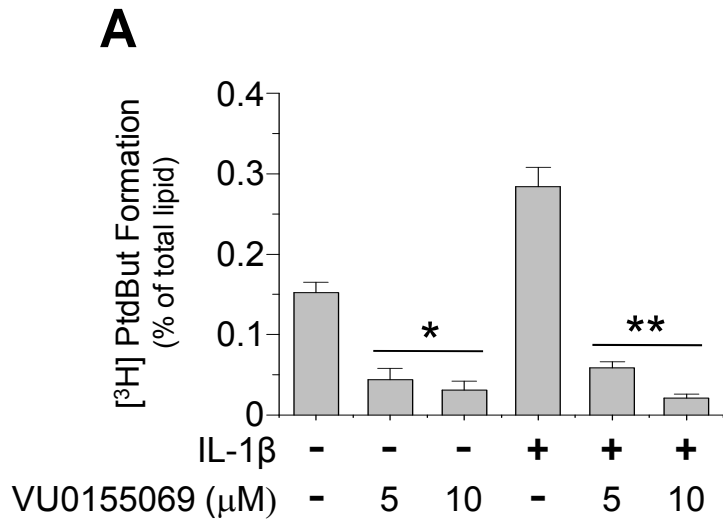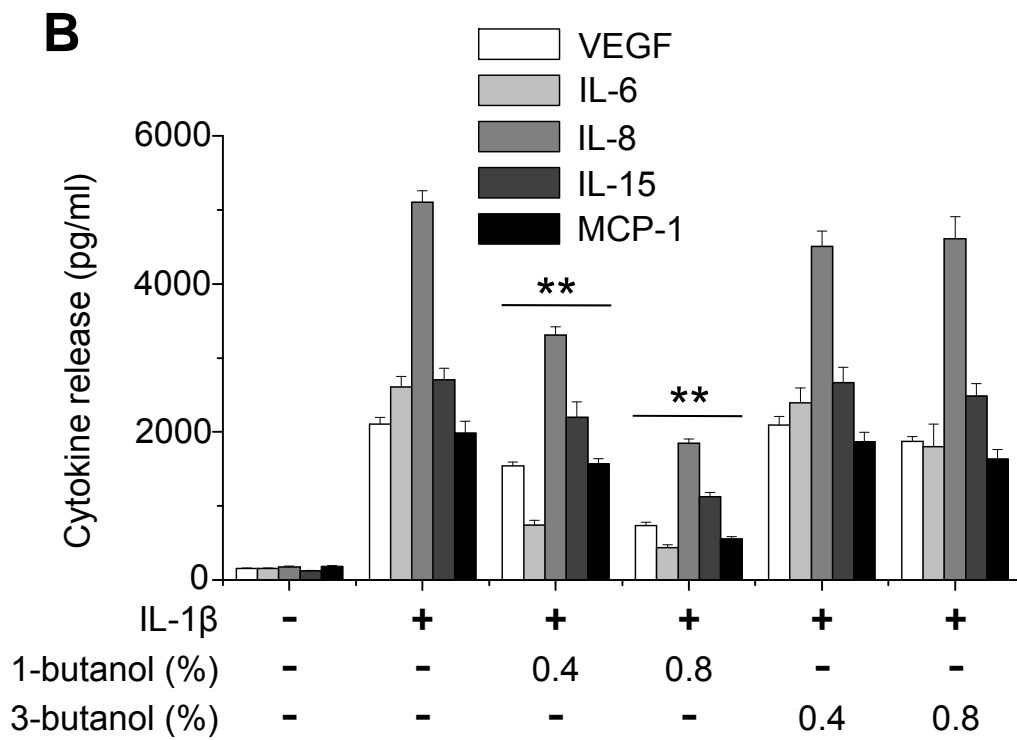

# Fig. S4

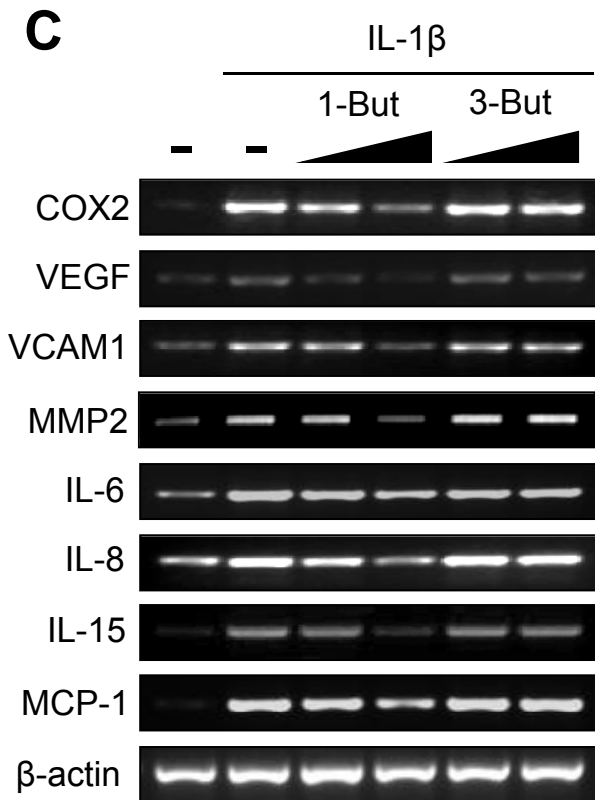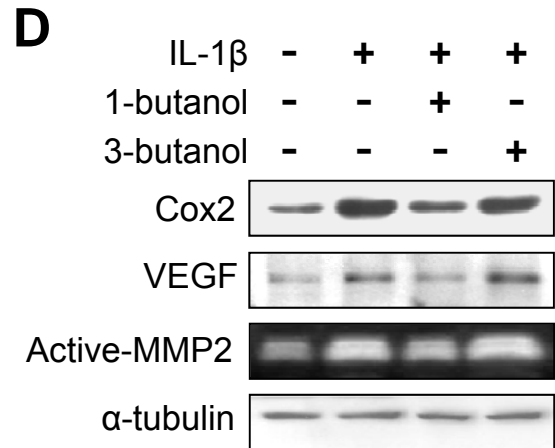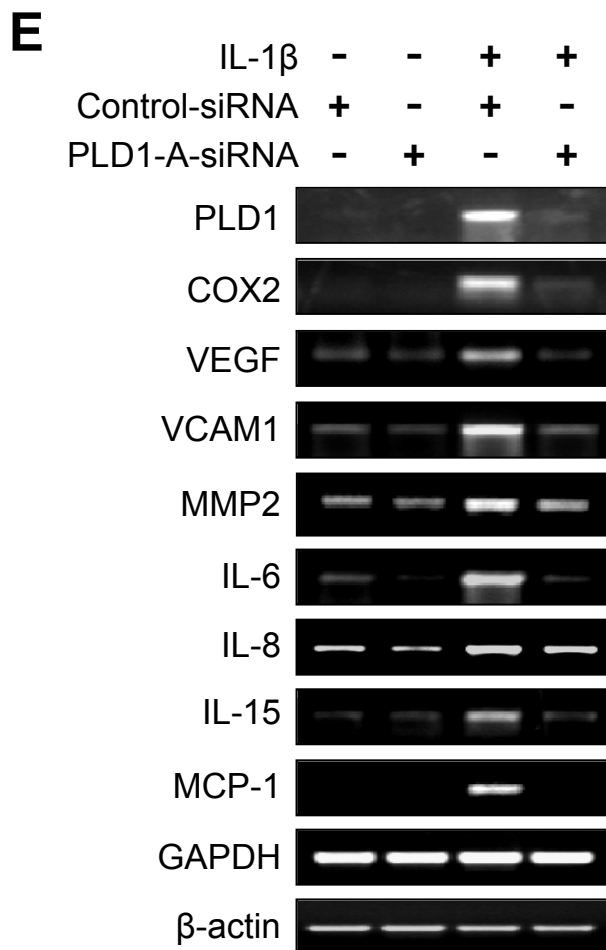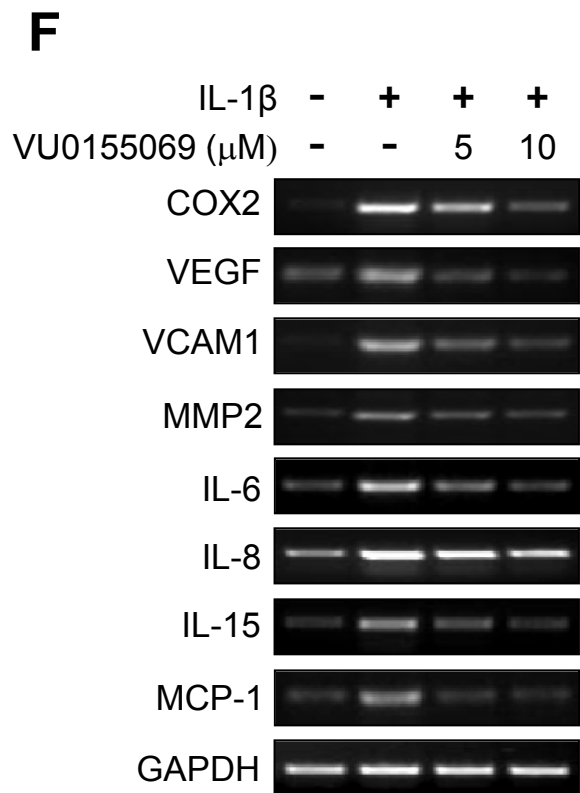



**Fig. S4** PLD activity is required for IL-1 $\beta$ -induced expression of proinflammatory mediators and angiogenic factors in RAFLS. (A) RAFLS were labeled with [ $^3$ H] myristate for 12 h, pretreated with VU0155069 for 30 min, and then stimulated with IL-1 $\beta$ , after which PLD activity was measured. RAFLS were treated with 1 or 3-butanol and then stimulated with IL-1 $\beta$  for 24 h, after which the secretion and expression of proinflammatory molecules were determined by ELISA (B) and RT-PCR (C). (D) RAFLS were pretreated with 1- or 3-butanol (0.4%) and then treated with IL-1 $\beta$  for 36 h. The expression of COX-2 and VEGF was analyzed by Western blotting, and MMP-2 activity was analyzed by gelatin zymography of the conditioned media. RAFLS were transfected with siRNA specific to PLD1 (E) or pretreated with or without VU0155069 (F), treated with IL-1 $\beta$  for 36 h, and then expression of various genes was analyzed by RT-PCR. \* $P$  < 0.01 *versus* vehicle; \*\* $P$  < 0.005 *versus* IL-1 $\beta$ . Data are presented as the mean  $\pm$  SD of 4 independent experiments.

# Fig. S5

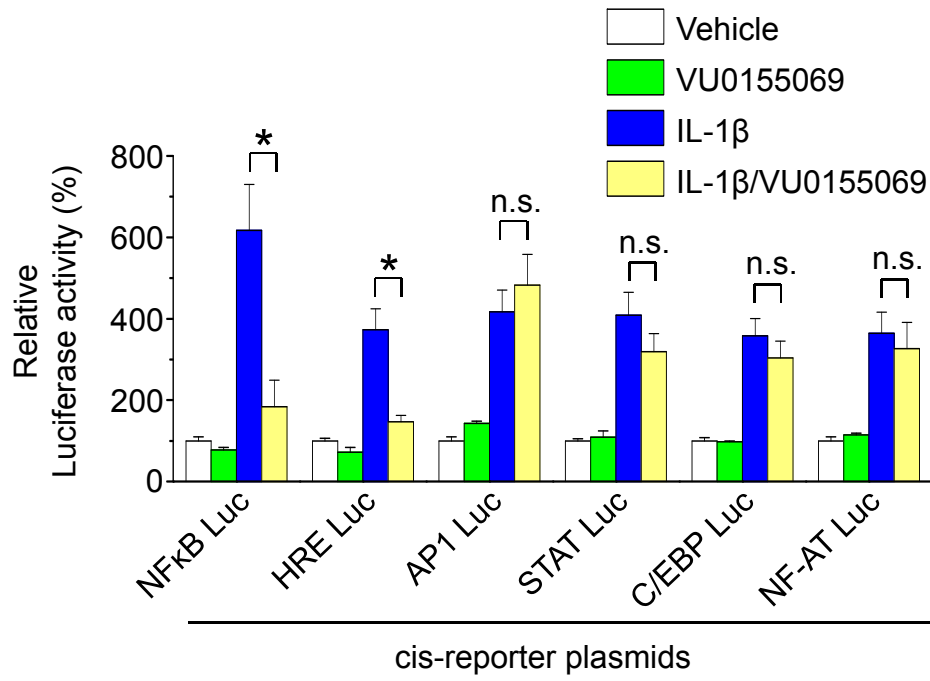

**Fig. S5** PLD1 inhibitor regulates the transactivation of NF $\kappa$ B, HIF and FoxO but not AP1, STAT, C/EBP, and NF-AT. After RAFLS were transfected with indicated reporter constructs, cells were pretreated with VU0155069, stimulated with IL-1 $\beta$  for 36 h, and then luciferase activity was determined. \* $P < 0.05$  versus IL-1 $\beta$ . Data are presented as the mean  $\pm$  SD of 4 independent experiments.

# Fig. S6

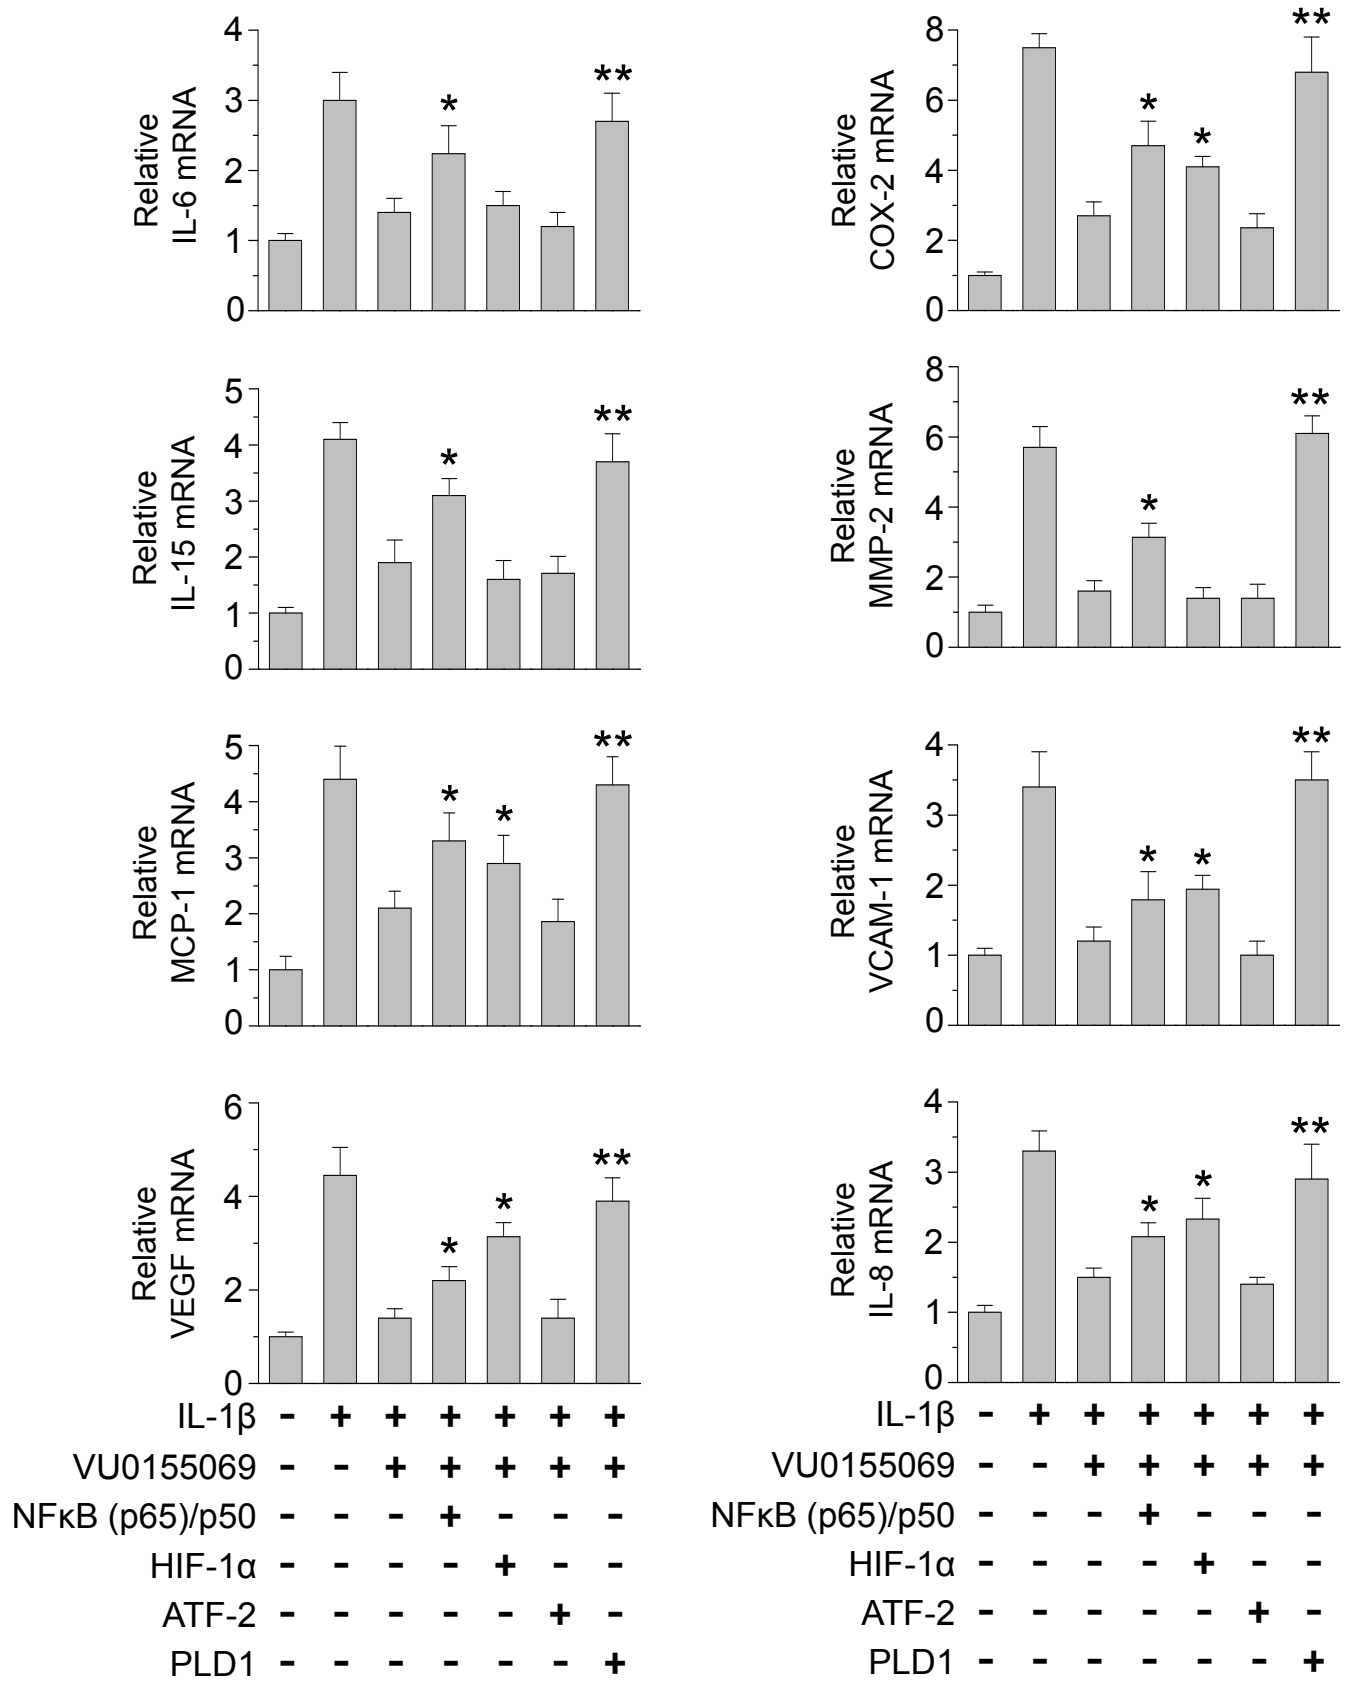

**Fig. S6** PLD1 inhibitor regulates the expression of proinflammatory molecules via NF $\kappa$ B, HIF-1 $\alpha$ , ATF-2 or PLD1. RAFLS were transfected with the indicated expression vectors, after which the cells were pretreated with VU0155069 and treated with IL-1 $\beta$  for 36 h. Expression of the indicated molecules was analyzed by q-PCR. \* $P < 0.05$  versus IL-1 $\beta$  and VU0155069. Data are presented as the mean  $\pm$  SD of 4 independent experiments.

# Fig. S7

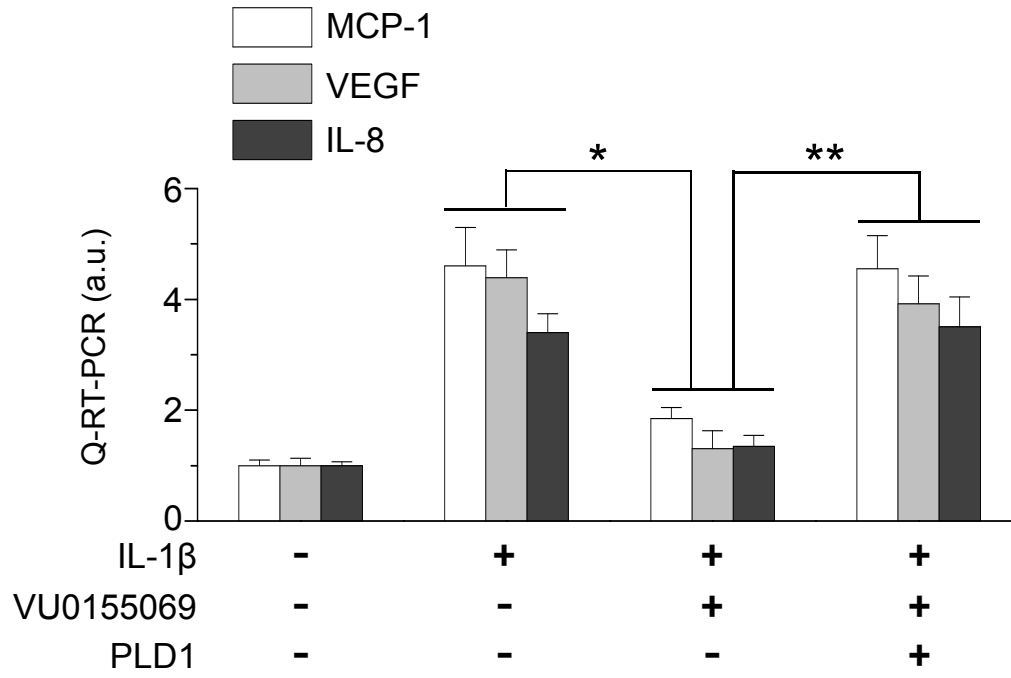

**Fig. S7** Ectopic expression of PLD1 recovers the suppressive effect of PLD1 inhibitor on IL-1 $\beta$  mediated gene expression via PLD1. RAFLS were transfected with or without PLD1, and then pretreated with or without VU0155069 (10  $\mu$ M) and treated with IL-1 $\beta$  for 36 h. Expression levels of MCP-1, IL-8, and VEGF were analyzed by q-PCR. \* $P$  < 0.05 *versus* IL-1 $\beta$ ; \*\* $P$  < 0.05 *versus* IL-1 $\beta$  and VU0155069. Data are presented as the mean  $\pm$  SD of 4 independent experiments.

# Fig. S8

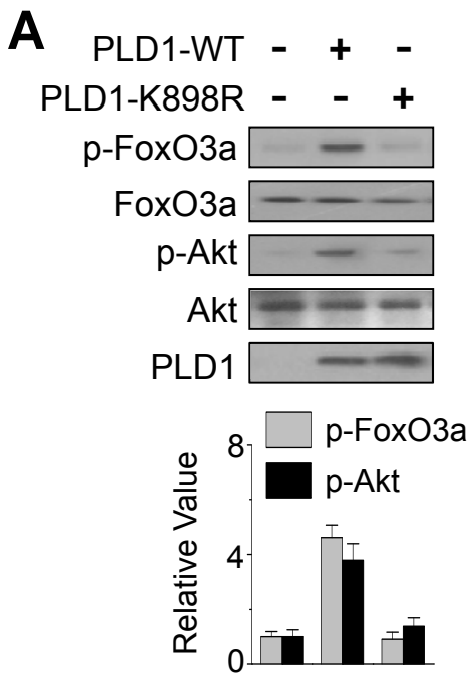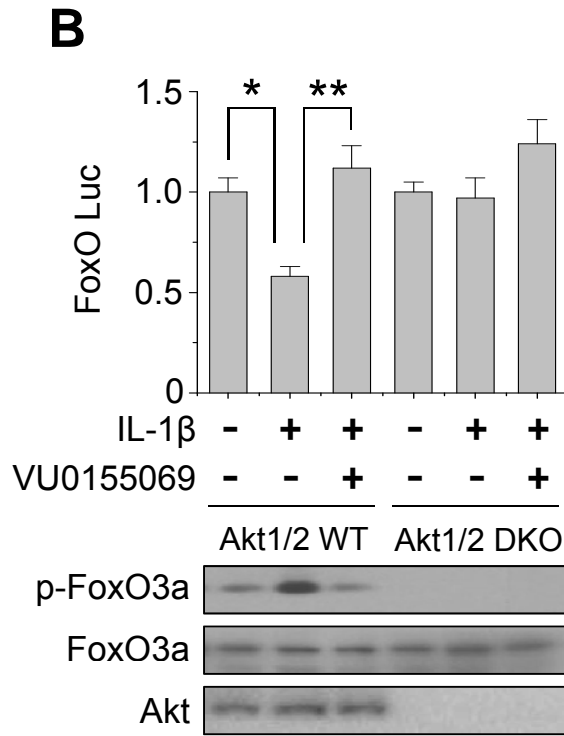



**FIG S8** Inhibition of PLD1 suppresses IL-1 $\beta$ -induced phosphorylation FoxO3a and enhances cell cycle arrest via transactivation of FoxO3a. (A) RAFLS were transfected with WT or K898R mutant of PLD1. Lysates were immunoblotted with the indicated antibodies. The relative levels of indicated proteins were quantitated by densitometer analysis. Data shown are representative of 4 independent experiments. (B) Akt1/2<sup>+/+</sup> and Akt1/2<sup>-/-</sup>MEFs were transfected with FoxO-Luc and treated with VU0155069 and/or IL-1 $\beta$ . Luciferase activity assay and immunoblotting were performed. \* $P$  < 0.01; \*\* $P$  < 0.05. Data are presented as the mean  $\pm$  SD of 4 independent experiments.

## Supplementary Table

**Table S1** Primer sets for ChIP assay on PLD1 promoter region

| Promoter | Oligo  | Direction | Sequence (5' to 3')            |
|----------|--------|-----------|--------------------------------|
| PLD1     | NFκB-1 | Forward   | CCAGCGAGGTGCATTCTAAA           |
|          |        | Reverse   | AGCCCTTATTATAACTCAATGAGTCT     |
|          | NFκB-2 | Forward   | CGAGACTCATTGAGTTATAATAAGGGCT   |
|          |        | Reverse   | CAAGGTCTTAGGCTTCTTGAGAATG      |
|          | NFκB-3 | Forward   | GATGTCTTTCGGAATAGGTATATTAATCAA |
|          |        | Reverse   | GGAGATTGGTTTGGGAAAGCTTA        |
|          | NFκB-4 | Forward   | CACACAGAGCAGGCTGAATTG          |
|          |        | Reverse   | GCTCAGATCATCCGTCTTTACC         |
|          | CRE    | Forward   | CTGCCCTGGGTACTGATGTG           |
|          |        | Reverse   | GAGATTTTGGCCATGACTTTACGTG      |

**Table S2** Primer sets for Q-RT-PCR

|          | Primer         | Direction | Sequence (5' to 3')      |
|----------|----------------|-----------|--------------------------|
| Q-RT-PCR | PLD1           | Forward   | TGTCGTGATAACCACTTCTGCCA  |
|          |                | Reverse   | AGCATTTTCGAGCTGCTGTTGAA  |
|          | PLD2           | Forward   | CATCCAGGCCATTCTGCAC      |
|          |                | Reverse   | GTGCTTCCGCAGACTCAAGG     |
|          | COX-2          | Forward   | TTCAAATGAGATTGTGGAAAAAT  |
|          |                | Reverse   | AGATCATCTCTGCCTGAGTATCTT |
|          | VEGF           | Forward   | AATCCAAATGCGGCATCT       |
|          |                | Reverse   | GAGTATGCCTGCCGTGTG       |
|          | VCAM-1         | Forward   | GGCTGTGAATCCCCATCTTT     |
|          |                | Reverse   | TCCACCTGGATTCCCTTTTC     |
|          | MMP-2          | Forward   | TGATCTTGACCAGAATACCATCGA |
|          |                | Reverse   | GGCTTGCGAGGGAAGAAGTT     |
|          | IL-6           | Forward   | GGTACATCCTCGACGGCATCT    |
|          |                | Reverse   | GTGCCTCTTTGCTGCTTTCAC    |
|          | IL-8           | Forward   | TCTCTTGGCAGCCTTCCTGATTC  |
|          |                | Reverse   | TCCAGACAGAGCTCTCTTCCATCA |
|          | IL-15          | Forward   | GTTTCAGTGCAGGGCTTCCTAAA  |
|          |                | Reverse   | TACTTTGCAACTGGGGTGAACAT  |
|          | MCP-1          | Forward   | GATCTCAGTGCAGAGGCTCG     |
|          |                | Reverse   | TGCTTGTCCAGGTGGTCCAT     |
|          | P27Kip1        | Forward   | GCAGGAGAGCCAGGATGTCAG    |
|          |                | Reverse   | ATGCGTGTCCCTCAGAGTTAGCC  |
|          | P21Cip1        | Forward   | GCAGGGGACAGCAGAGGAAG     |
|          |                | Reverse   | CGGCGTTTGGAGTGGTAGAAATC  |
|          | $\beta$ -actin | Forward   | GACTACCTCATGAAGATC       |
|          |                | Reverse   | GATCCACATCTGCTGGAA       |

**Table S3** Primer sets for RT-PCR

|        | Primer         | Direction | Sequence (5' to 3')         |
|--------|----------------|-----------|-----------------------------|
| RT-PCR | PLD1           | Forward   | AATCGTTGGAGGTTGGACTG        |
|        |                | Reverse   | AGACGGTGGAT GACACATGA       |
|        | PLD2           | Forward   | CTCTCCCCACTGGGGACGAA        |
|        |                | Reverse   | GACAGAATACAGAGTGCAGGTTCCCAC |
|        | COX-2          | Forward   | GTTCCACCCGCAGTACAG          |
|        |                | Reverse   | GGAGCGGGAAGAACTTGC          |
|        | VEGF           | Forward   | ATCGAGACCCTGGTGGACA         |
|        |                | Reverse   | TGTGCTGGCCTTGGTGAG          |
|        | VCAM-1         | Forward   | ATGACATGCTTGAGCCAGG         |
|        |                | Reverse   | GTGTCTCCTTCTTTGACACT        |
|        | MMP-2          | Forward   | GGCCCTGTCACTCCTGAGAT        |
|        |                | Reverse   | GGCATCCAGGTTATCGGGGA        |
|        | IL-6           | Forward   | CAGATGAGTACAAAAGTCCTG       |
|        |                | Reverse   | CTACATTTGCCGAAGAGCGC        |
|        | IL-8           | Forward   | CAGTTTTGCCAAGGAGTGCTAA      |
|        |                | Reverse   | AACTTCTCCACAACCCTCTGC       |
|        | IL-15          | Forward   | GAGTTACAAGTTATTTCACTTGAG    |
|        |                | Reverse   | CAAGAAGTGTTGATGAACATTTGG    |
|        | MCP-1          | Forward   | ATGGAGGTCCCTGTCATG          |
|        |                | Reverse   | GCTTGAGGTGGTTGTGGA          |
|        | GAPDH          | Forward   | GTGGTCTCCTCTGACTTCAAC       |
|        |                | Reverse   | TCTCTTCCTCTTGTGCTCTTG       |
|        | $\beta$ -actin | Forward   | GACTACCTCATGAAGATC          |
|        |                | Reverse   | GATCCACATCTGCTGGAA          |

**Table S4** Primer sets for Chip assay on NF $\kappa$ B or HIF1 $\alpha$  target genes

| Promoter | Oligo         | Direction | Sequence (5' to 3')         |
|----------|---------------|-----------|-----------------------------|
| IL-6     | NF $\kappa$ B | Forward   | ACCCTCACCTCCAACAAAGATTTATC  |
|          |               | Reverse   | GGGCTAAGGATTCCTGCACTTACTT   |
| IL-15    | NF $\kappa$ B | Forward   | CGGCAGGTAGAGGAGGAGACCGGT    |
|          |               | Reverse   | TGAAAGAGAAAGAGCCGGGAGCATAGG |
| MMP-2    | NF $\kappa$ B | Forward   | GCATCTCGCACTATAACGAGGCCAAGT |
|          |               | Reverse   | CAGAGACAGTGGAAGGTCCCAGGTTG  |
| VCAM-1   | NF $\kappa$ B | Forward   | CTTTTGCCAGGACAGAGAGAGGAGC   |
|          |               | Reverse   | GTATTCAGCTCCTGAAGCCAGTGAGG  |
| VEGF     | NF $\kappa$ B | Forward   | GGGAGGAAGAGTAGCTCGCC        |
|          |               | Reverse   | AAGTTCATGGTTTCGGAGGC        |
|          | HRE           | Forward   | CCTTTGGGTTTTGCCAGACTCCACAG  |
|          |               | Reverse   | CACCAAGTTTGTGGAGCTGAGAACG   |
| IL-8     | NF $\kappa$ B | Forward   | GGCCATCAGTTGCAAATCGTG       |
|          |               | Reverse   | TTCCTTCCGGTGGTTTCTTCTCTG    |
|          | HRE           | Forward   | GTGTGATGACTCAGGTTTGCCCT     |
|          |               | Reverse   | CAGTGAGATGGTTCCTTCCGGTGGT   |
| MCP-1    | NF $\kappa$ B | Forward   | GTAAACACAGGGAAGGTGAAGGGTATG |
|          |               | Reverse   | GGAACTTCCAAAGCTGCCTCCTCAGAG |
|          | HRE           | Forward   | CAGACGTGGTACCCACAGTCTTGC    |
|          |               | Reverse   | GAAGCAGCTGGGGGAGTAACTGCGC   |
| COX-2    | NF $\kappa$ B | Forward   | GGGAGGGATCAGACAGGAGAGTGG    |
|          |               | Reverse   | AAGCCCATGTGACGAAATGACTGTTTC |
|          | HRE           | Forward   | CGACGTGACTTCTCGACCCTCTAAAG  |
|          |               | Reverse   | CAGAAGGACACTTGGCTTCTCTCC    |
